# Supplementary material
Source: publisher figshare collection journal article supplement (https://karger.figshare.com/ndownloader/files/9500956)
Supplement: Supplementary file 1 [file 9500956]

Figure S1

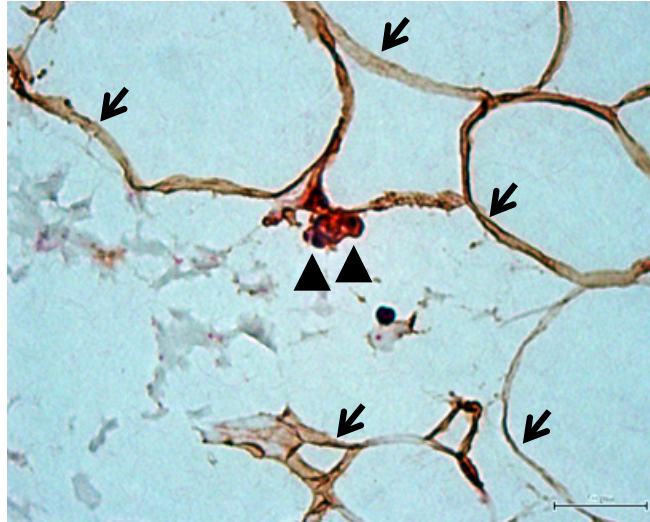

**Figure S1. Expression of FABP4 in adipocytes and macrophages of perirenal adipose tissue.** Double immunohistochemical staining of FABP4 (brown) and CD68 (red) in perirenal adipose tissue within a renal biopsy specimen. FABP4 was expressed in adipocytes (arrow) and in CD68-positive macrophages (arrowhead).

Figure S2

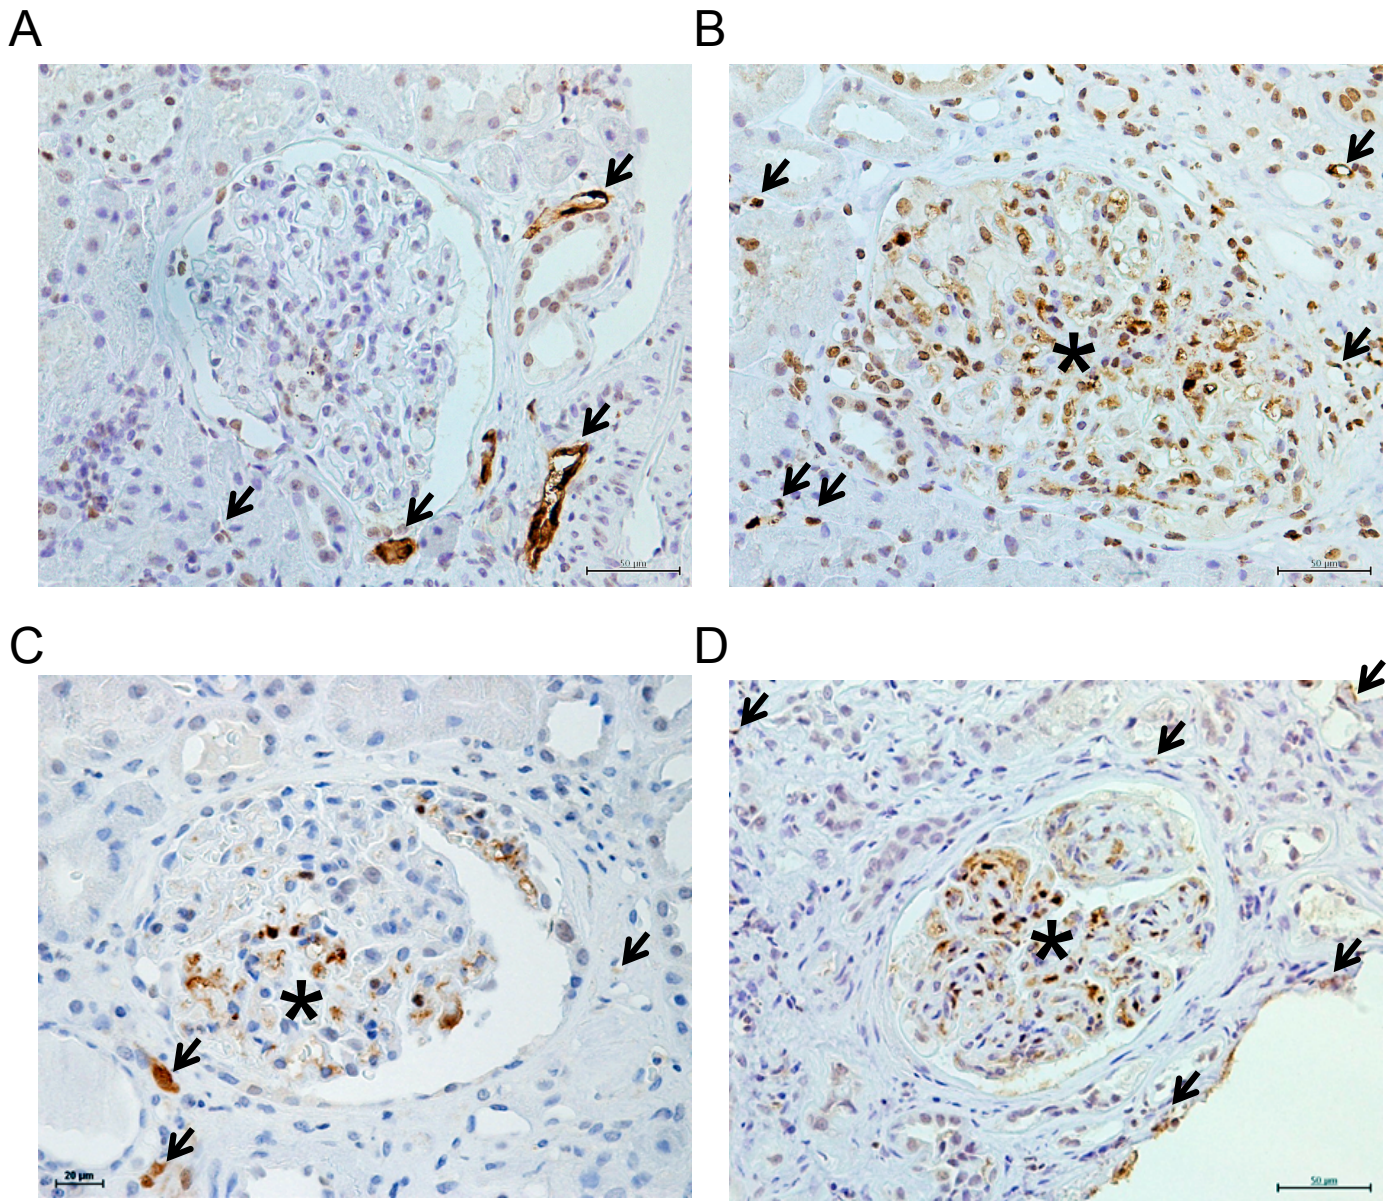

**Figure S2. Glomerular expression of FABP4 in human biopsy specimens (other disease).**

Representative immunohistochemical staining with anti-FABP4 antibody in a patient with IgA nephropathy (Oxford classification M1/S0/E0/T0) (eGFR, 82 mL/min/1.73m<sup>2</sup>; urinary protein, 0.1 g/gCr) (A), a patient with IgA nephropathy (Oxford classification M1/S1/E1/T1) (eGFR, 56 mL/min/1.73m<sup>2</sup>; urinary protein, 1.9 g/gCr) (B), a patient with crescentic glomerulonephritis (eGFR, 15 mL/min/1.73m<sup>2</sup>; urinary protein, 1.3 g/gCr) (C) and a patient with diabetic nephropathy (eGFR, 18 mL/min/1.73m<sup>2</sup>; urinary protein, 15.9 g/gCr) (D). FABP4 protein was expressed in peritubular capillaries (A, B,C,D arrow) and glomerulus (B, C, D asterisk).

Figure S3

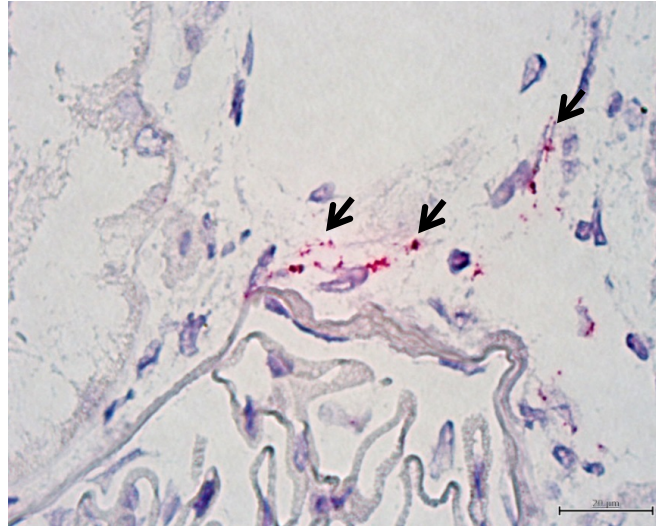

**Figure S3. Expression of FABP4 mRNA in interstitial tissue of the kidney.** FABP4 mRNA was detected by *in situ* hybridization in peritubular capillaries (arrow) but not in tubular epithelial cells.



Figure S4

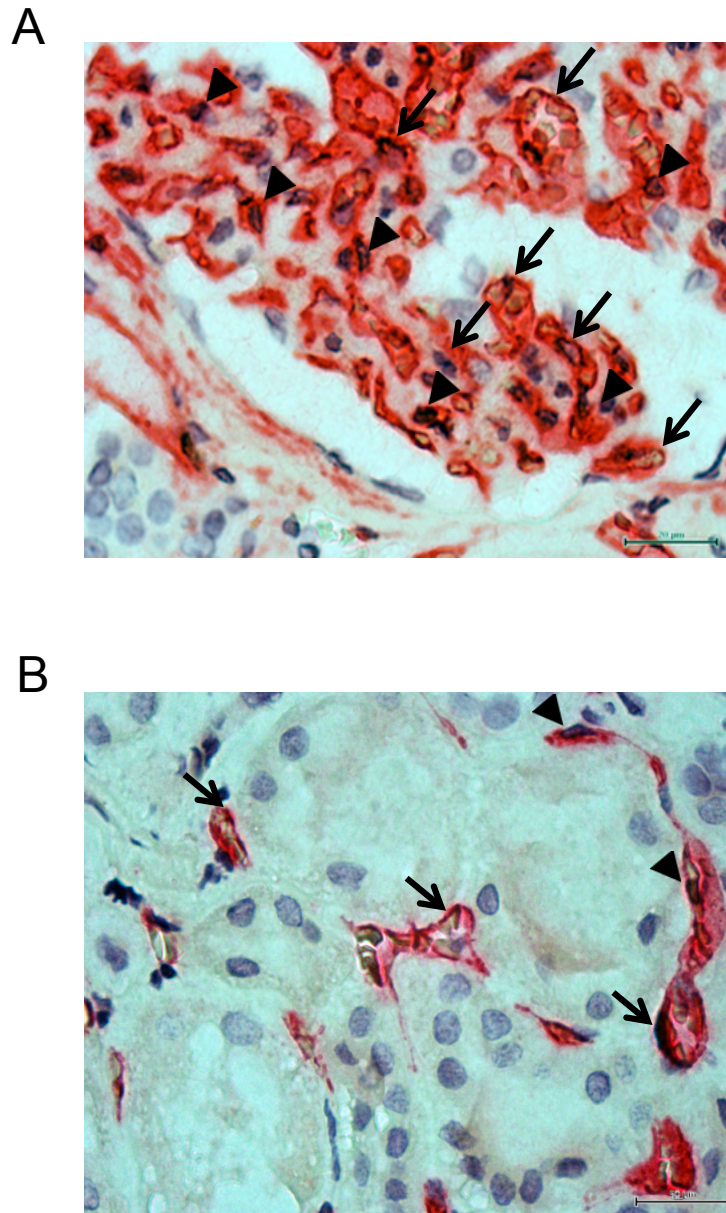

**Figure S4. Intracellular localization of FABP4 protein in the glomerulus and tubulointerstitium.**

**A, B.** FABP4 protein expression was assessed by double immunohistochemical staining with antibodies against FABP4 (brown) and CD34 (red). FABP4 and CD34 were expressed in the nucleus (arrow) and cytoplasm (arrowhead) in endothelial cells of glomerular endothelial cells (A) peritubular capillaries (B).
